# Supplementary material for: Design of a core–shell support to improve lipase features by immobilization
Source: Royal Society of Chemistry journal article supplement (doi:10.1039/c6ra13350a), 2016-01-01
Supplement: c6ra13350a1.pdf [file c6ra13350a1.pdf]

**Supporting information.**

**Figure 1S.** Loading capacity of PS-co-DVB/PS-co-DVB support in the immobilization of different commercial lipases: (A) CALB; (B) RML; (C) LU; (D) TLL.

Experiments were performed as described in Section 2.2.3.

**Figure 2S.** Loading capacity of PS/PS support in the immobilization of different commercial lipases : (A) CALB; (B) RML; (C) LU; (D) TLL.

Experiments were performed as described in Section 2.2.3.

**Figure 3S.** Loading capacity of octyl-agarose in the immobilization of different commercial lipases : (A) CALB; (B) RML; (C) LU; (D) TLL.

Experiments were performed as described in Section 2.2.3.

Figure 1S.

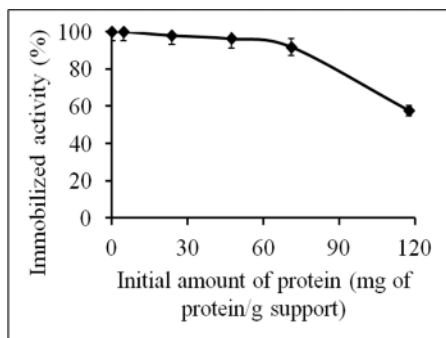

(A)

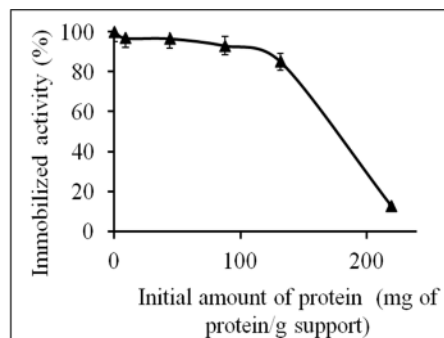

(B)

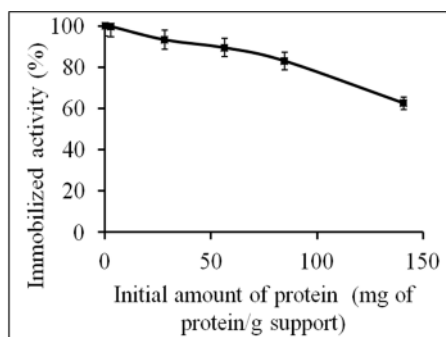

(C)

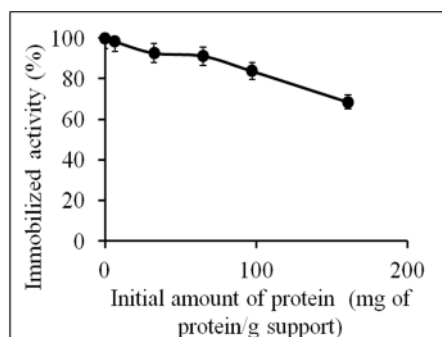

(D)

Figure 2S

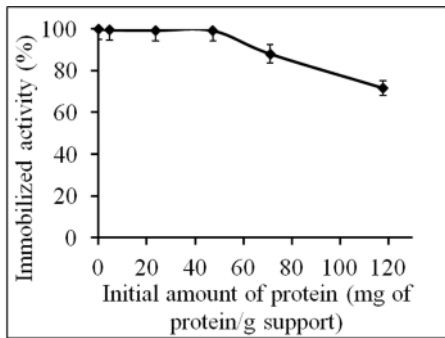

(A)

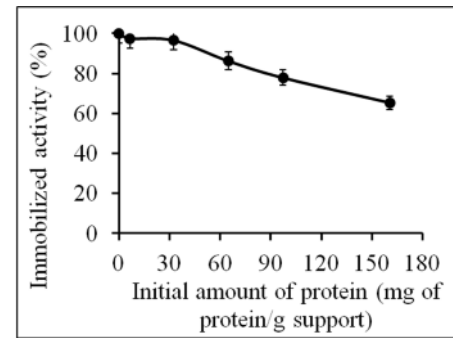

(B)

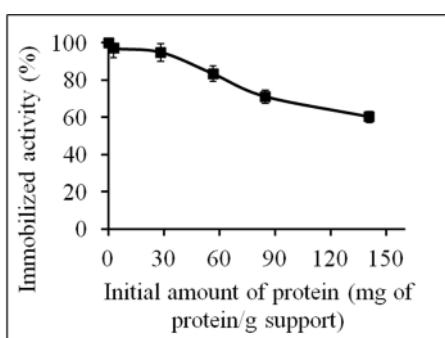

(C)

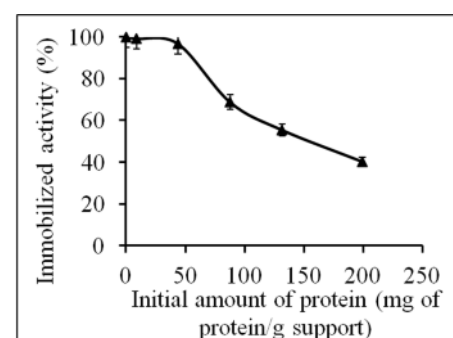

(D)

Figure 3S

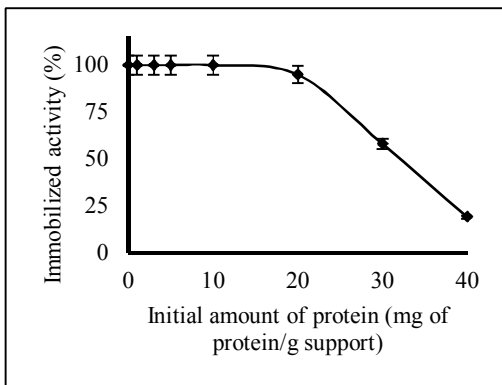

(A)

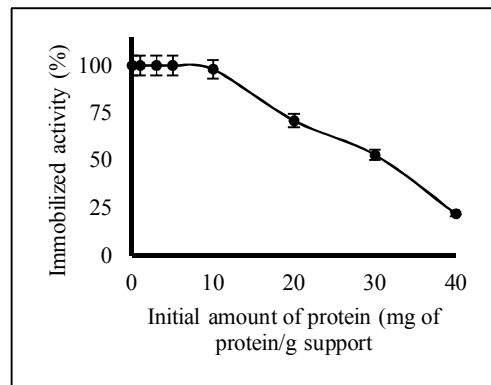

(B)

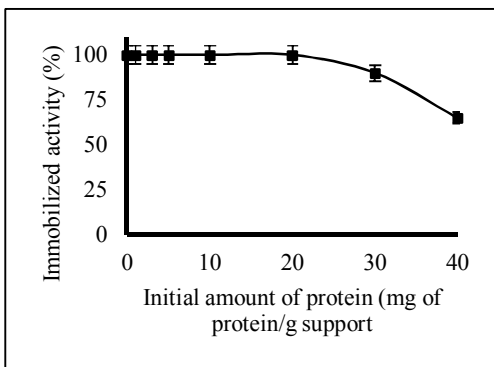

(C)

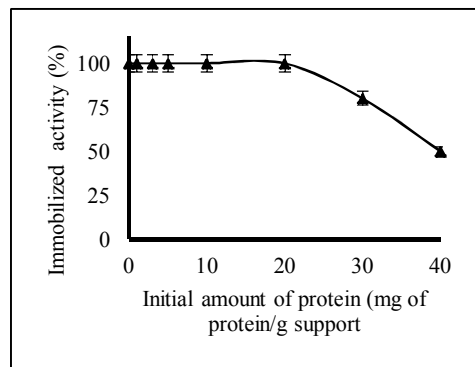

(D)

| <b>Biocatalyst</b>              | <b>pH 5</b> | <b>Temperature,<br/>(°C)</b> | <b>pH 9</b> | <b>Temperature,<br/>(°C)</b> |
|---------------------------------|-------------|------------------------------|-------------|------------------------------|
| <b>OC CALB</b>                  | 100±7       | 81                           | 70±4        | 59                           |
| <b>PS/PS CALB</b>               | 40±2        | 81                           | 50±4        | 59                           |
| <b>PS-co-DVB/PS-co-DVB CALB</b> | 95±5        | 81                           | 68±5        | 59                           |
| <b>OCRML</b>                    | 300±15      | 52                           | 600         | 72                           |
| <b>PS/PS RML</b>                | 170±10      | 52                           | 40          | 72                           |
| <b>PS-co-DVB/PS-co-DVB RML</b>  | 580±20      | 52                           | 120         | 72                           |
| <b>OCTLL</b>                    | 300±20      | 60                           | 100±4       | 63                           |
| <b>PS/PS TLL</b>                | 210±15      | 60                           | 60±5        | 63                           |
| <b>PS-co-DVB/PS-co-DVB TLL</b>  | 85±4        | 60                           | 24±2        | 63                           |
| <b>OC LU</b>                    | 20±1        | 50                           | 100±7       | 44                           |
| <b>PS/PS LU</b>                 | 40±3        | 50                           | 180±10      | 44                           |
| <b>PS-co-DVB/PS-co-DVB LU</b>   | 12±2        | 50                           | 55±4        | 44                           |

**Table 1S.- Half-lives of the different enzyme biocatalyst at pH 5 and 9.** Temperature was selected to have values that could be reliable. Experiments were performed by triplicate.
